# Supplementary material for: The Role of Pretreatment Serum Interleukin 6 in Predicting Short-Term Mortality in Patients with Advanced Pancreatic Cancer
Source: MDPI journal article supplement (doi:10.3390/biomedicines12040903), 2024-04-18
Supplement: s1 [file s1]

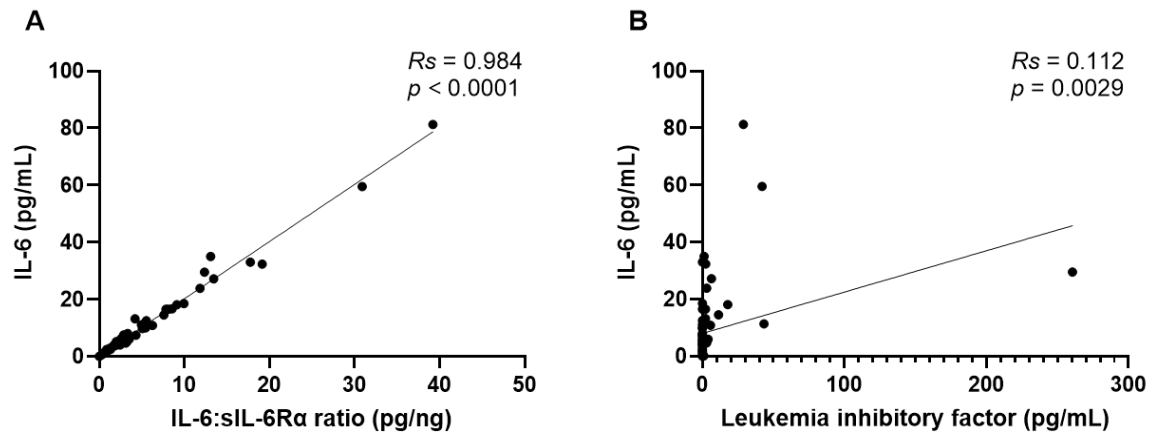

**Figure. S1 Relationship between serum IL-6 and related biomarkers. (A)** Correlation of serum IL-6 concentrations with the ratio of IL-6 to soluble IL-6 receptor. **(B)** Association between IL-6 concentrations and serum levels of leukemia inhibitory factor.

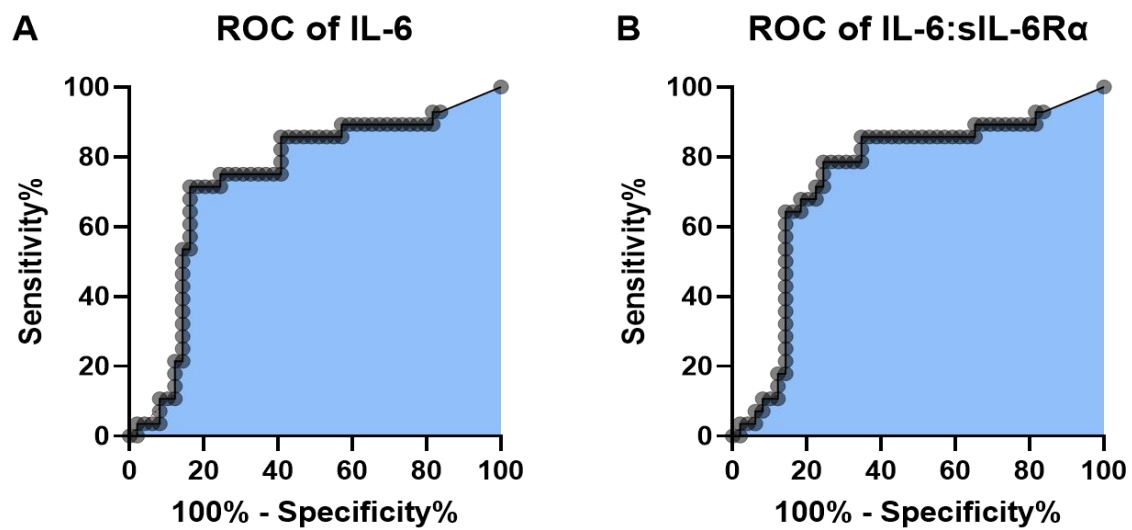

**Figure. S2 Receiver operating characteristic (ROC) curve analysis to define an optimal prognostic cutoff value for predicting 6-month survival of patients with advanced pancreatic cancer. (A) ROC curve for serum interleukin-6 levels, (B) ROC curve for ratio of interleukin-6 to soluble interleukin-6 receptor.**

**Table S1. Efficacy of first-line systemic chemotherapy in patients with advanced pancreatic cancer categorized by serum IL-6 and soluble IL-6R $\alpha$  ratio**

| <b>Variables</b>                      | <b>Total<br/>(n=65)</b> | <b>IL-6:sIL-6R<math>\alpha</math> high<br/>(n=25)</b> | <b>IL-6:sIL-6R<math>\alpha</math> low<br/>(n=40)</b> | <b><i>p</i> value</b> |
|---------------------------------------|-------------------------|-------------------------------------------------------|------------------------------------------------------|-----------------------|
| <b>First-line chemotherapy, n (%)</b> |                         |                                                       |                                                      |                       |
| Gemcitabine-based                     | 41 (63.1)               | 20 (80.0)                                             | 21 (52.5)                                            | 0.025                 |
| Gemcitabine single                    | 5 (7.7)                 | 5 (20.0)                                              | 0                                                    |                       |
| Gemcitabine / Nab-paclitaxel          | 36 (55.4)               | 15 (60.0)                                             | 21 (52.5)                                            |                       |
| FOLFIRINOX                            | 24 (36.9)               | 5 (20.0)                                              | 19 (47.5)                                            |                       |
| <b>Best response, n (%)</b>           |                         |                                                       |                                                      |                       |
| Partial response                      | 11 (16.9)               | 3 (12.0)                                              | 8 (20.0)                                             |                       |
| Stable disease                        | 32 (49.2)               | 8 (32.0)                                              | 24 (60.0)                                            |                       |
| Progressive disease                   | 22 (33.9)               | 14 (56.0)                                             | 8 (20.0)                                             |                       |
| <b>Objective response rate, n (%)</b> | 11 (16.9)               | 3 (12.0)                                              | 8 (20.0)                                             | 0.509                 |
| <b>Disease control rate, n (%)</b>    | 43 (66.2)               | 11 (44.0)                                             | 32 (80.0)                                            | <b>0.003</b>          |
| <b>Median PFS, months [95% CI]</b>    | 5.9 [4.8–7.0]           | 3.1 [0.5–5.7]                                         | 9.1 [6.8–11.4]                                       | <0.001                |
| <b>6-months PFS, % [95% CI]</b>       |                         | 21.7 [8.0–39.7]                                       | 63.9 [46.7–81.1]                                     |                       |

*IL-6* interleukin-6, *IL-6R $\alpha$*  interleukin-6 receptor  $\alpha$  subunit, *FOLFIRINOX* fluorouracil, leucovorin, irinotecan, and oxaliplatin, *PFS* progression-free survival.
